# Supplementary material for: A Rapid Appraisal of Factors Influencing Praziquantel Treatment Compliance in Two Communities Endemic for Schistosomiasis in Côte d’Ivoire
Source: MDPI journal article supplement (doi:10.3390/tropicalmed3020069), 2018-06-19
Supplement: s1 [file s1]

## Questionnaire for praziquantel mass treatment coverage evaluation in rural areas in Côte d'Ivoire

*(Note: this questionnaire targets school-aged children (6-15 years) and adults (≥16 years))*

Interviewer name: .....

Health district: .....

Location: .....

### PARTICIPANT IDENTIFICATION

First name: ..... Family name: .....

Age: ..... (years)

Sex: M ☐ F ☐

### PARTICIPANT MAIN ACTIVITY

*What is your main activity? (only for adults, ≥16 years)*

Cocoa growing ☐ Coffee growing ☐ Rubber growing ☐ Vegetable crops ☐  
Rice culture ☐ Trade ☐ Others ☐ (Specify, .....)

*What is the main activity of your parents? (Only for school-aged children, 6-15 years)*

Cocoa growing ☐ Coffee growing ☐ Rubber growing ☐ Vegetable crops ☐  
Rice culture ☐ Trade ☐ Others ☐ (specify, .....)

### ADHERENCE TO MASS TREATMENT

*Have you recently received treatment for schistosomiasis?*

Yes ☐ No ☐

*If so, why did you agree to take the medicine?*

I felt sick ☐ I wanted to do like the others ☐ I know that schistosomiasis is bad for my health ☐  
Other ☐ (specify, .....)

*What did you not like during the treatment?*

The taste of the medicine ☐ The size of the tablets ☐ Feeling after treatment ☐  
Other ☐ (specify, .....)

*How did you feel a week after treatment?*

Bad ☐ Well ☐ Very well ☐ Nothing was changed ☐

**If you have to take once more the medicine will you do it?**

Yes ☐ No ☐

**If no, why did you not agree to be treated once more?**

I did not feel sick ☐ I once took the medicine and got trouble ☐ I was concerned about my  
field work ☐ I have not been informed ☐ My parents refused to take it ☐ Other  
(specify .....)

**When do you think is the right period for mass treatment?**

Dry season ☐ Rain season ☐ Mornings ☐ Nights ☐

At any time if we are well informed ☐ Other ☐ (specify, .....)

**What is the best place for you to do the treatment?**

Public place ☐ Health centre ☐ Door-to-door ☐ Other ☐  
(specify, .....)
